# Supplementary material
Source: PubMed Central journal article supplement (PMC4999317)
Supplement: supp_WNL.0000000000003002_Supplementary_Figure_e-1.pdf [file supp_WNL.0000000000003002_Supplementary_Figure_e-1.pdf]

Supplementary Figure e-1: *Range of ADOS subscores by grouping*

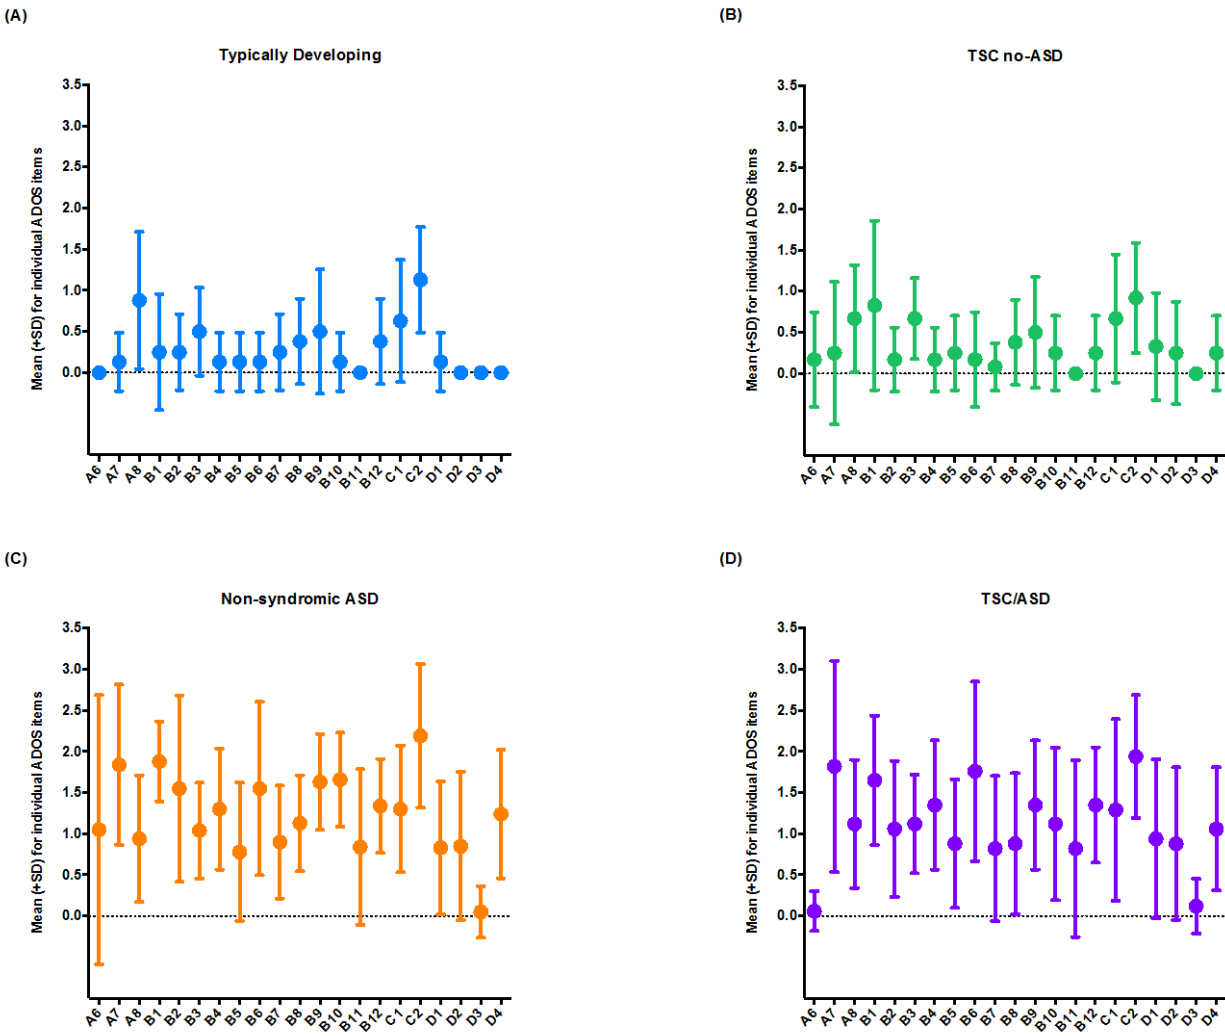

For each group there was a range in ADOS item scores. This figure provides a visualization of the range in scores by group. This figure is intended to supplement figure 2 in the manuscript.
