# Supplementary material
Source: PubMed Central journal article supplement (PMC4999317)
Supplement: supp_WNL.0000000000003002_Supplementary_Figure_e-2.pdf [file supp_WNL.0000000000003002_Supplementary_Figure_e-2.pdf]

Supplementary Figure e-2: *Mullen Sub-scores: TSC/ASD vs. TSC/no ASD*

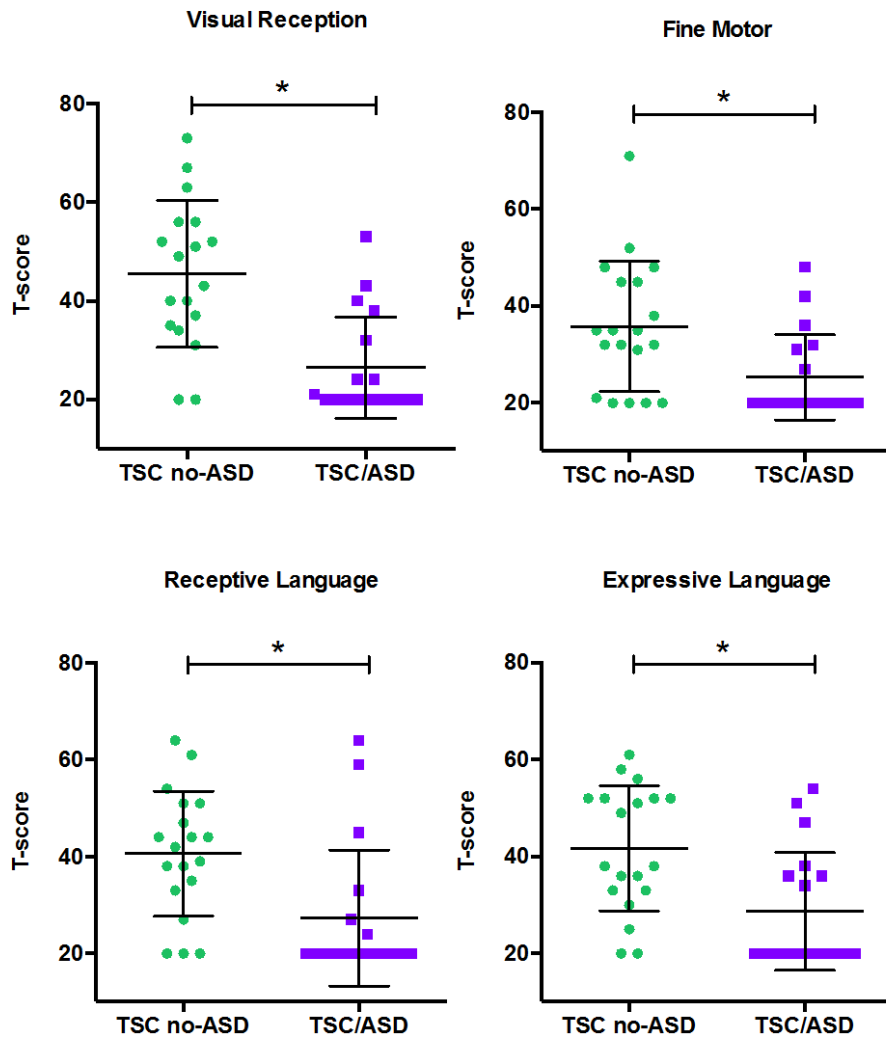

Group comparisons of mean Mullen Scales of Early Learning scores by developmental domain (visual reception, fine motor, receptive language and expressive language). T scores are normed at 50 with a standard deviation of 10.
